# Supplementary material for: Comparative genomics incorporating translocation renal cell carcinoma mouse model reveals molecular mechanisms of tumorigenesis
Source: PubMed Central journal article supplement (PMC10977987; doi:10.1172/jci170559), 2024-02-22

Uncropped/unedited versions of all gel and blot images, related to Figure 3D

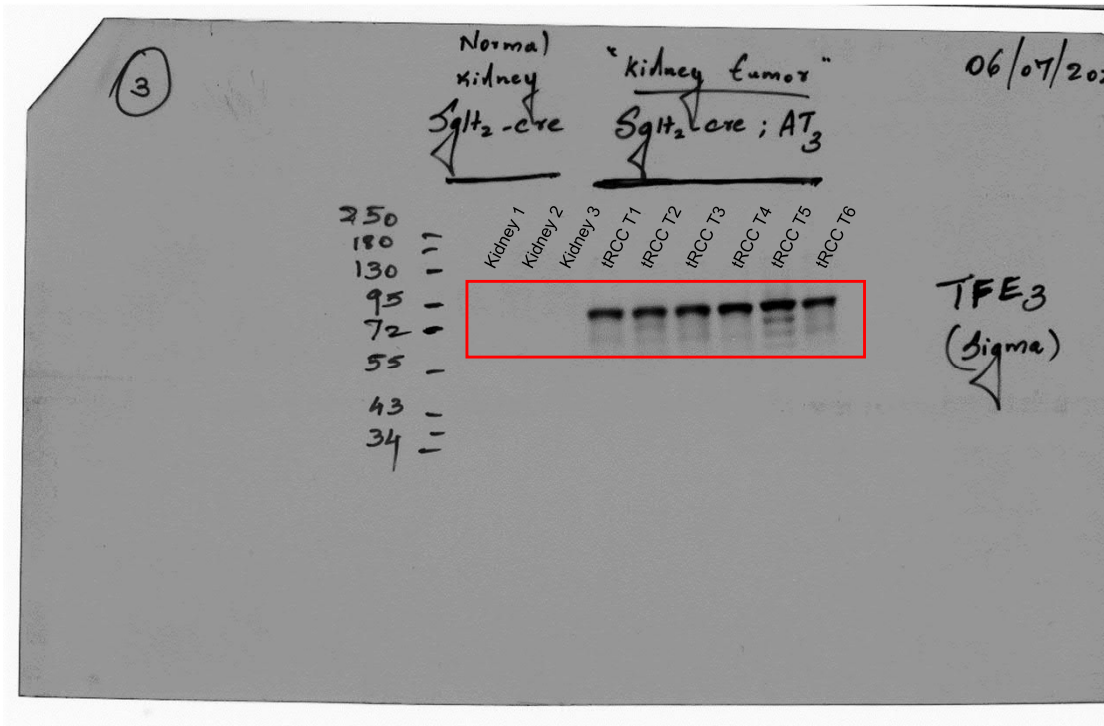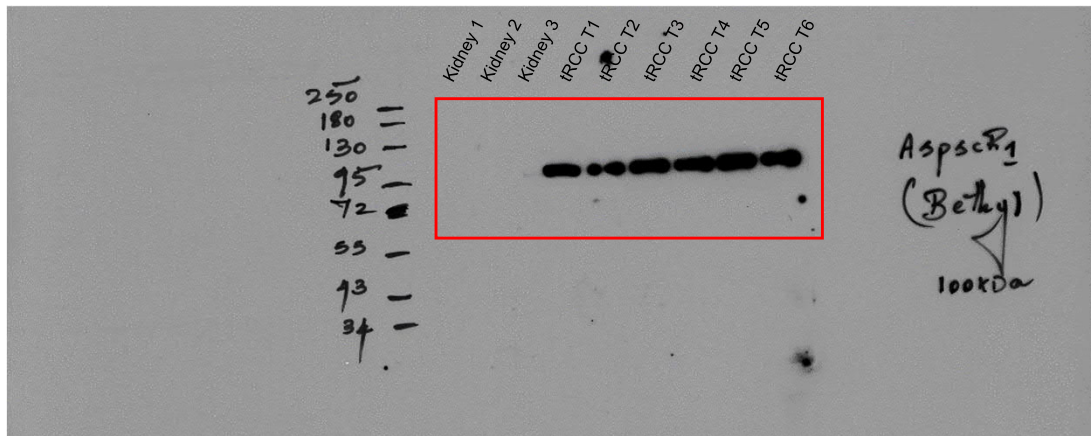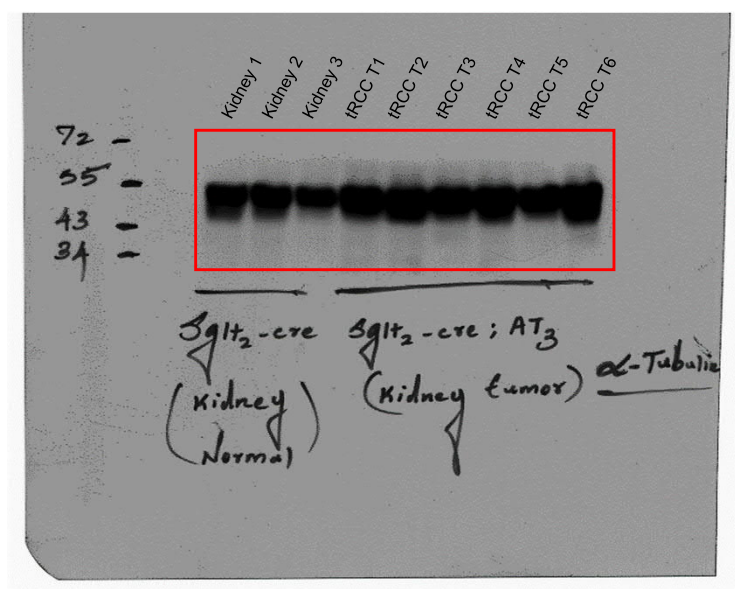

Uncropped/unedited versions of all gel and blot images, related to Figure 6C

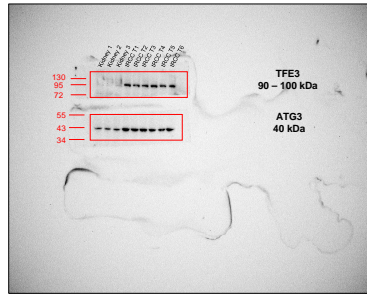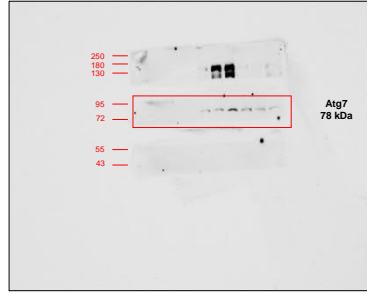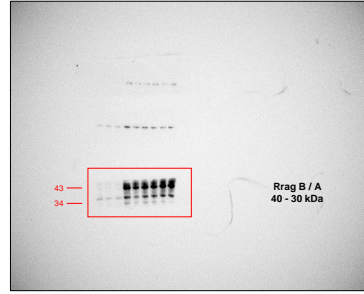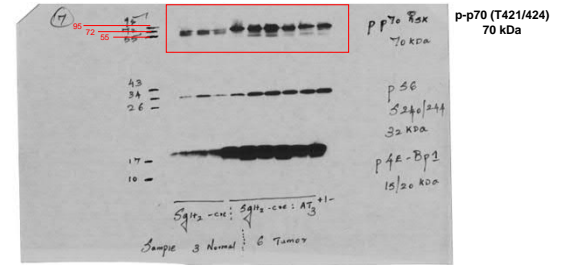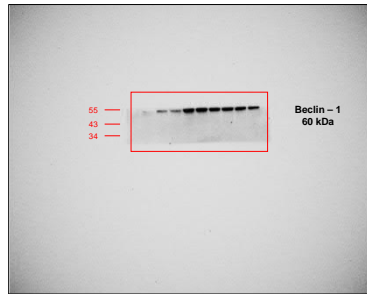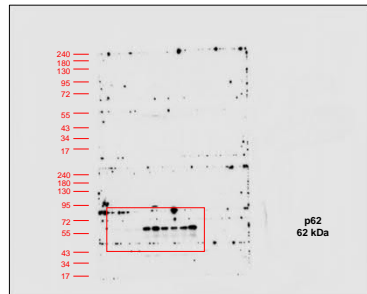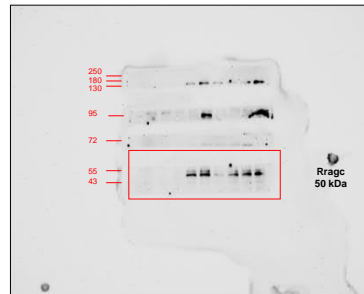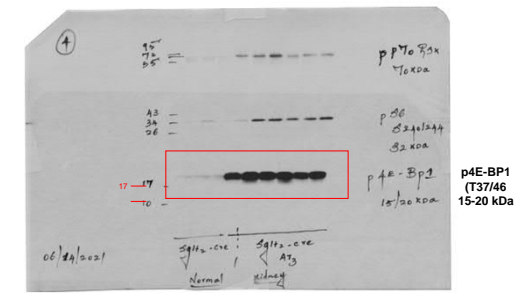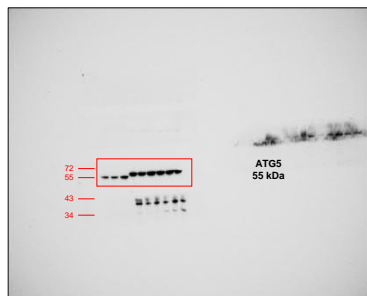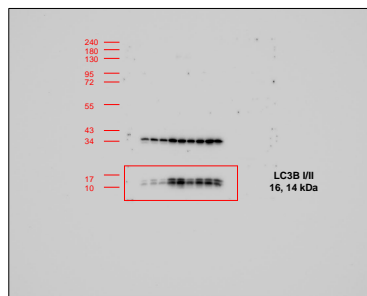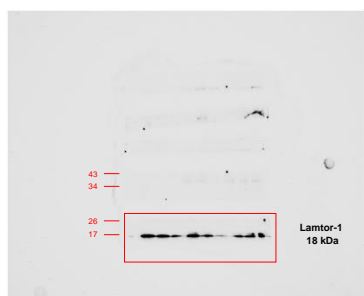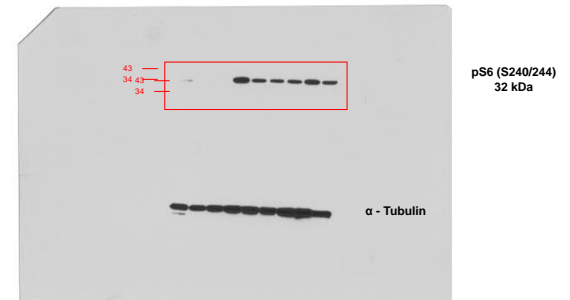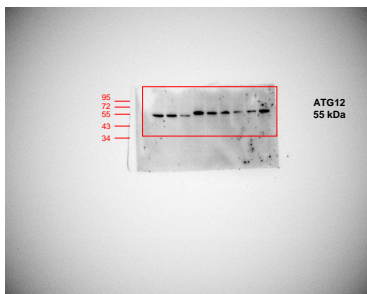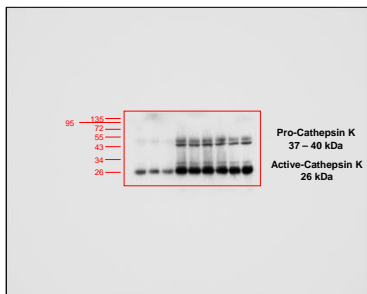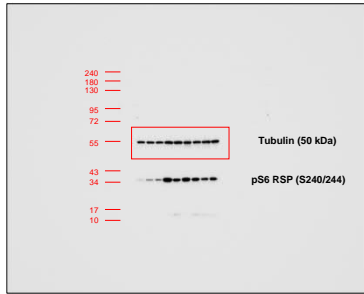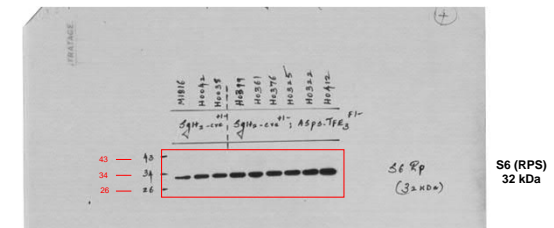

Uncropped/unedited versions of all gel and blot images, related to Figure 6J

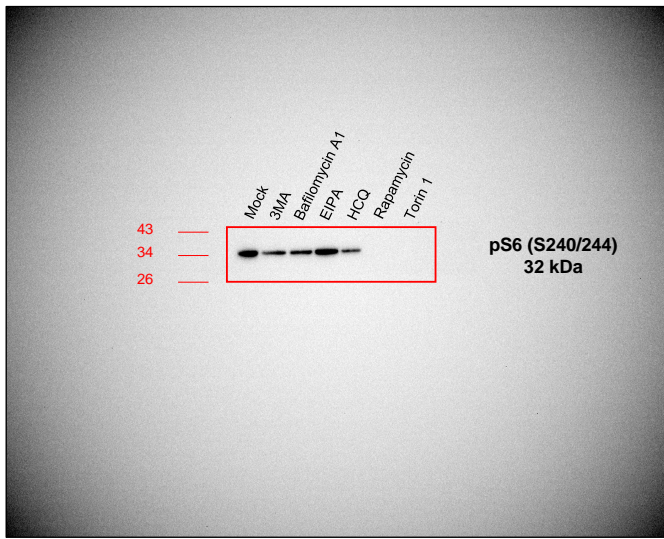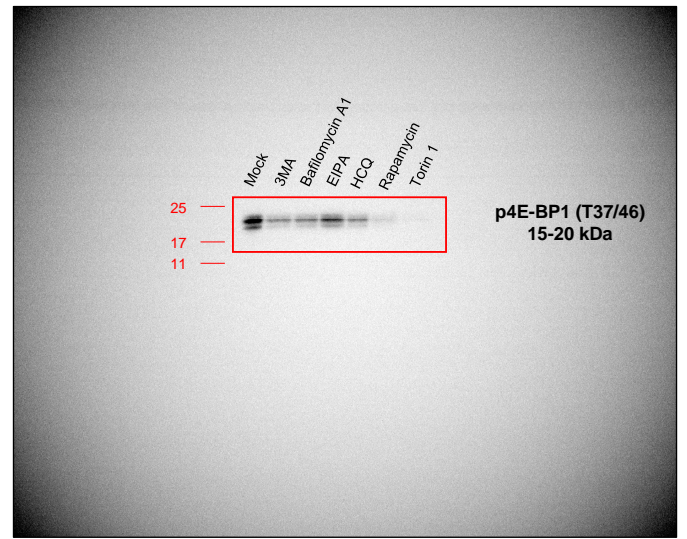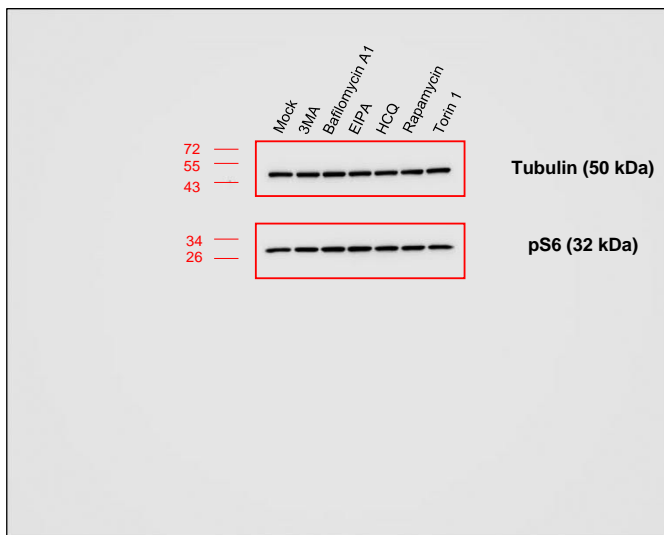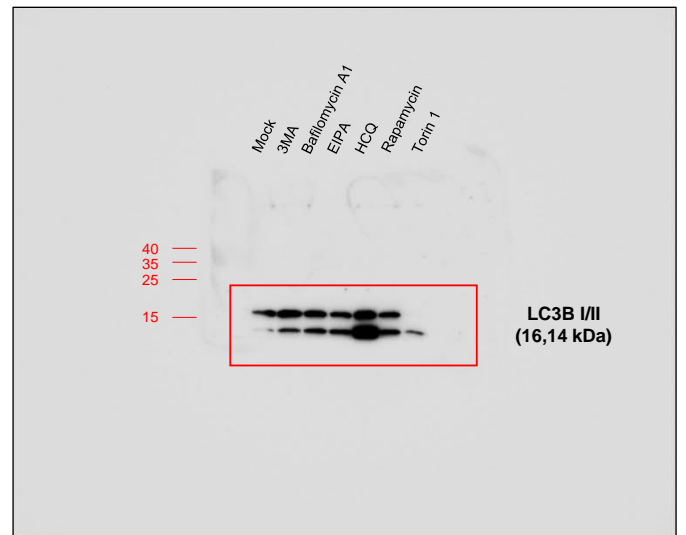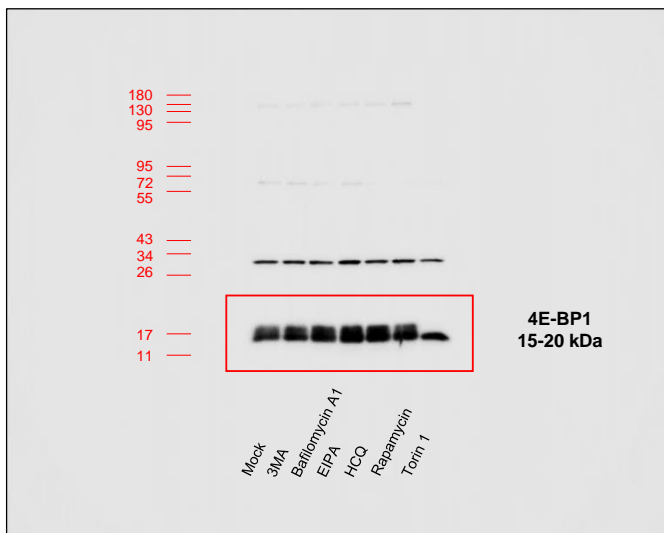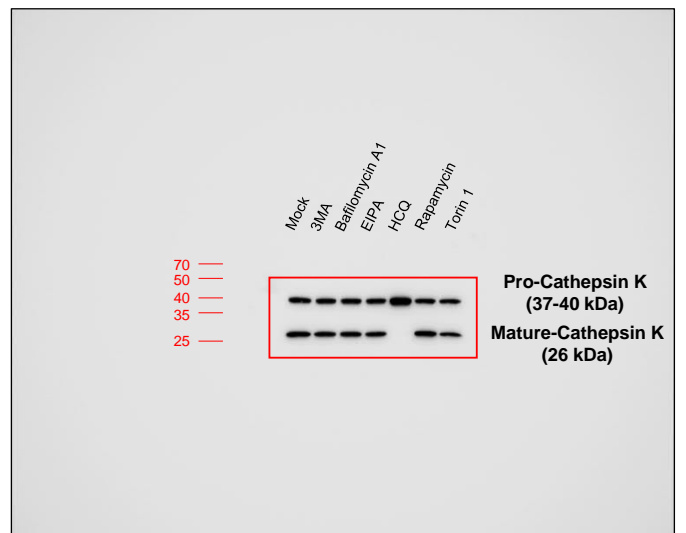

Uncropped/unedited versions of all gel and blot images, related to Supplementary Figure S10G

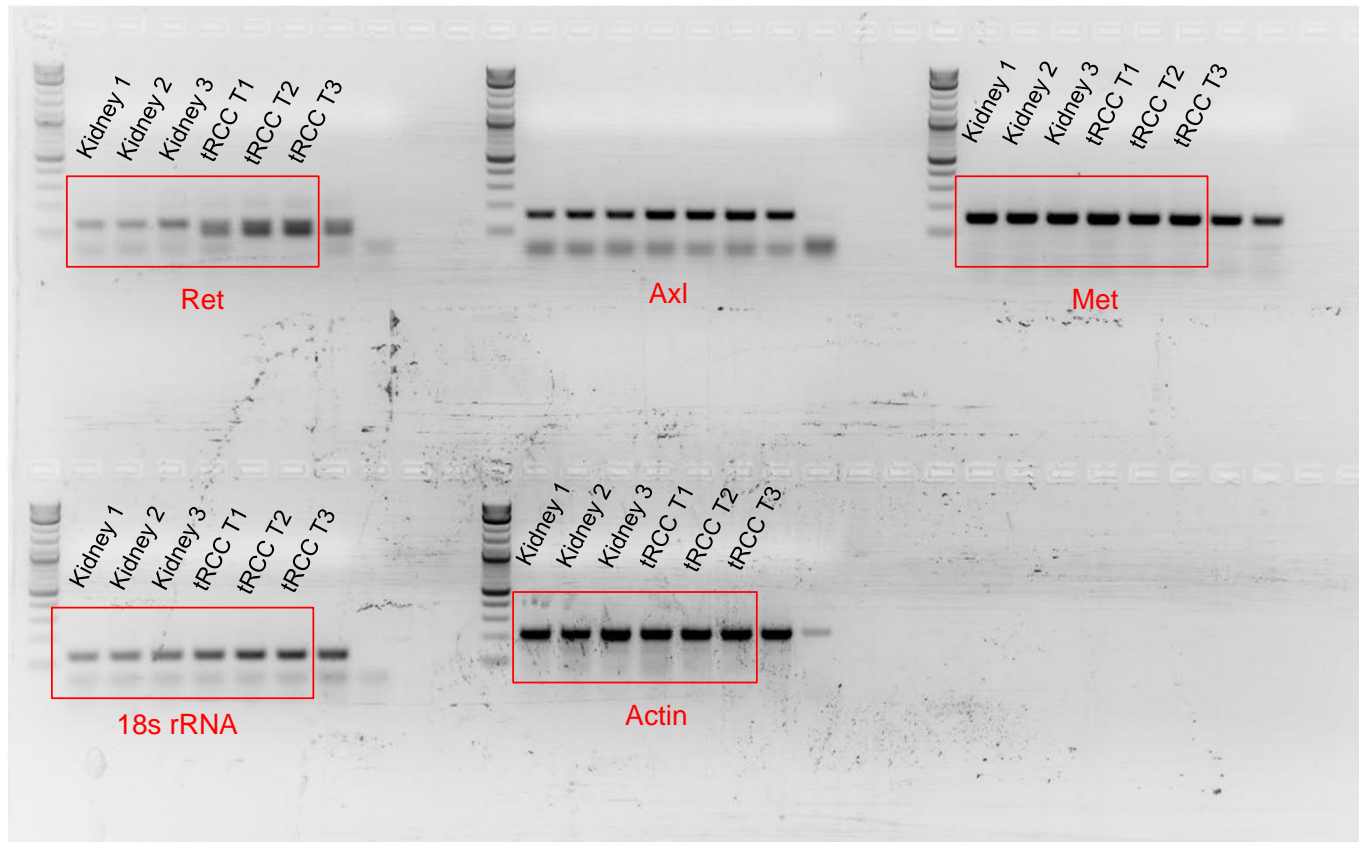

Supplement: jci-134-170559-s167.pdf [file jci-134-170559-s167.pdf]
